# Supplementary material for: Periodontal Tissue Regeneration Using Syngeneic Adipose‐Derived Stromal Cells in a Mouse Model
Source: PubMed Central journal article supplement (PMC5442818; doi:10.5966/sctm.2016-0028), 2016-09-16
Supplement: SCT3-6-656-s001.pdf [file SCT3-6-656-s001.pdf]

Supplemental Figures

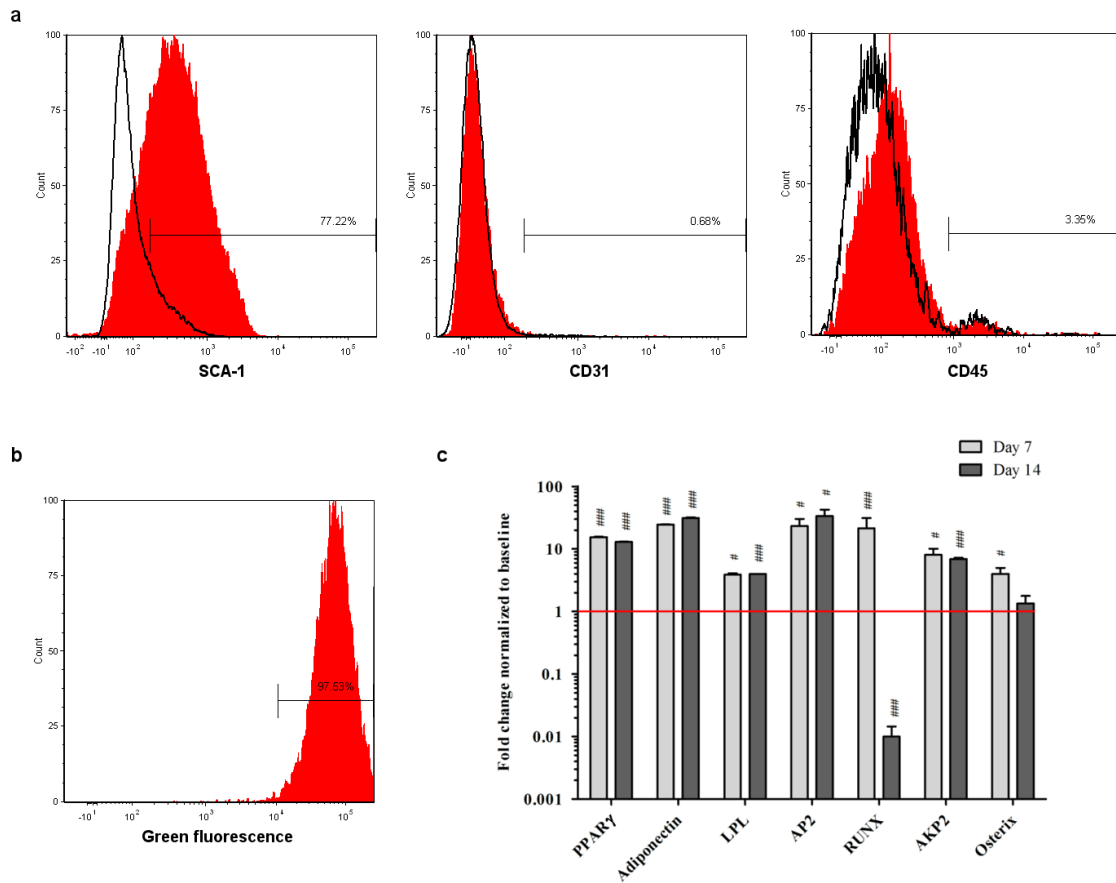

**Fig. S1: Characterization of ASC from GFP+ mice.** (a) Illustration of a flow cytometry analysis of CD31, CD45 and SCA-1 markers for DAPI negative (viable) ASC from GFP mice (red line). Black line: Isotype-matched negative control antibody. (b) Green fluorescence acquisition for ASC from GFP mice. (c) Fold change of Osterix, AKP2, Runx, AP2, LPL, Adiponectin, PPAR $\gamma$  gene expression compared to 36B4 and normalized to baseline values, 7 and 14 days-maintained in medium with osteogenic or adipogenic supplement. “#”, “##” and “###” indicate a significant difference between treatment and control sides with  $p < 0.05$ ,  $p < 0.01$  and  $p < 0.001$  respectively.

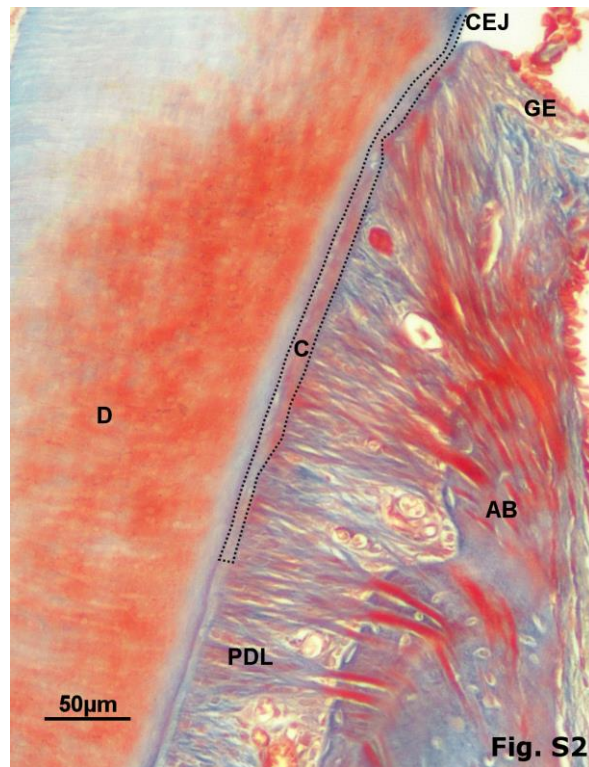

**Fig. S2: Example of cementum measurement.** In untreated periodontitis-induced mice (0 week, day 0 surgery), a frame of 1000 pixels' height was drawn downward the CEJ to the remaining cementum surface area, here in dotted lines, to quantify the cementum defect.

AB: alveolar bone, C: cementum, CEJ: cemento-enamel junction, D: dentin, GE: gingival epithelium, PDL: periodontal ligament.

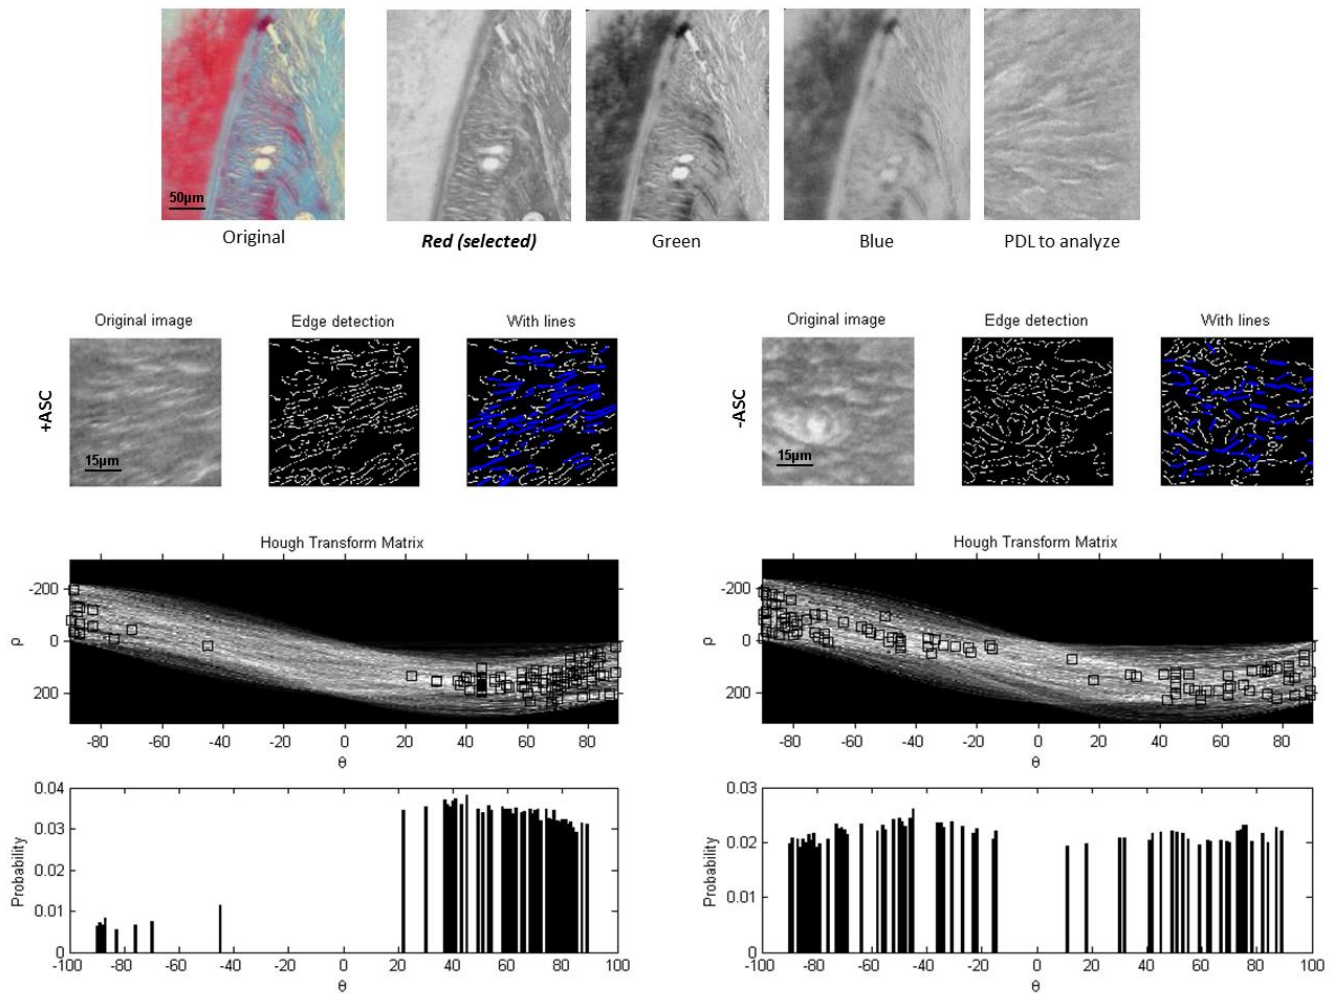

**Fig. S3: Measure of the periodontal ligament organization by entropy.** Red components of histological sections were extracted, edges were detected and the Hough Transform matrix was employed to select lines corresponding to the main directions of detected fibers. The probability for each angular direction was plotted as a histogram. The entropy of this distribution was computed, which provided a statistical measure of randomness.

ASC

+

-

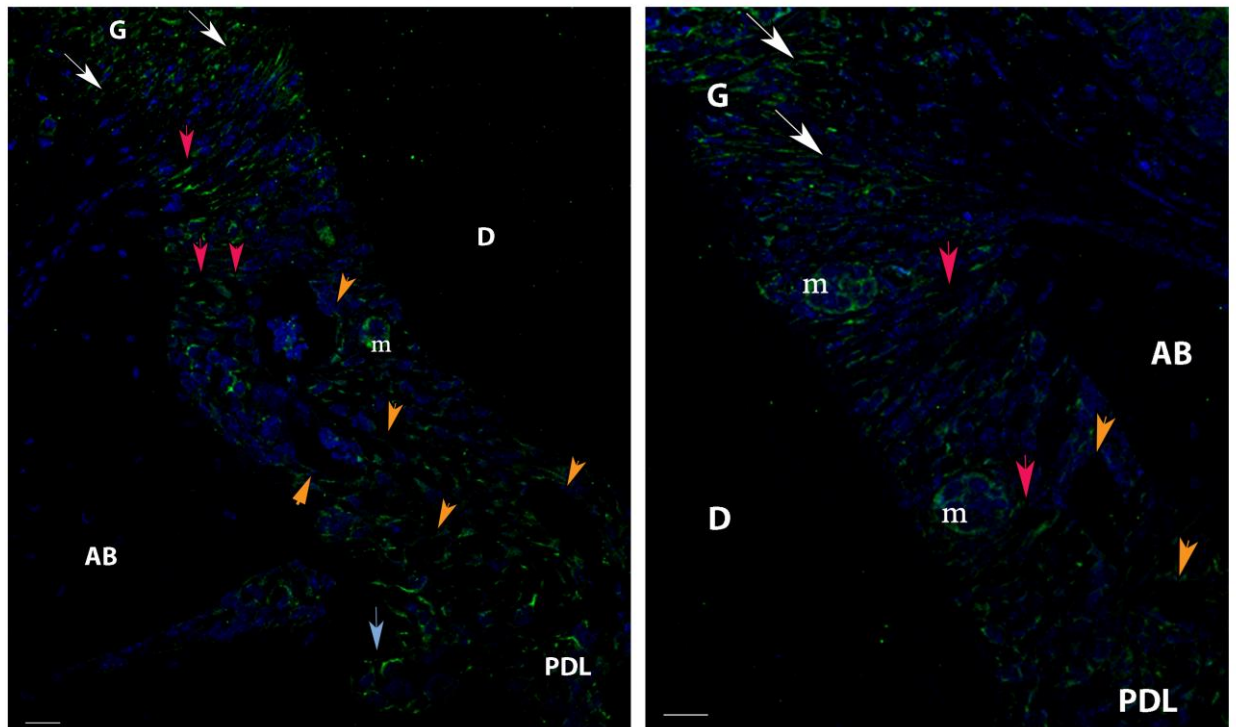

**Fig. S4: CD31 expression in periodontal tissue, 6 weeks after grafting with (+) or without (-) ASC+/GFP.** Gingiva (white arrows), small (red arrows), large (orange arrows) and AB (blue arrow) vessels are displayed; cell nuclei in blue. AB: alveolar bone, D: dentin, G: gingiva, m: epithelial cell rests of Malassez, PDL: periodontal ligament. Bar: 50  $\mu$ m.

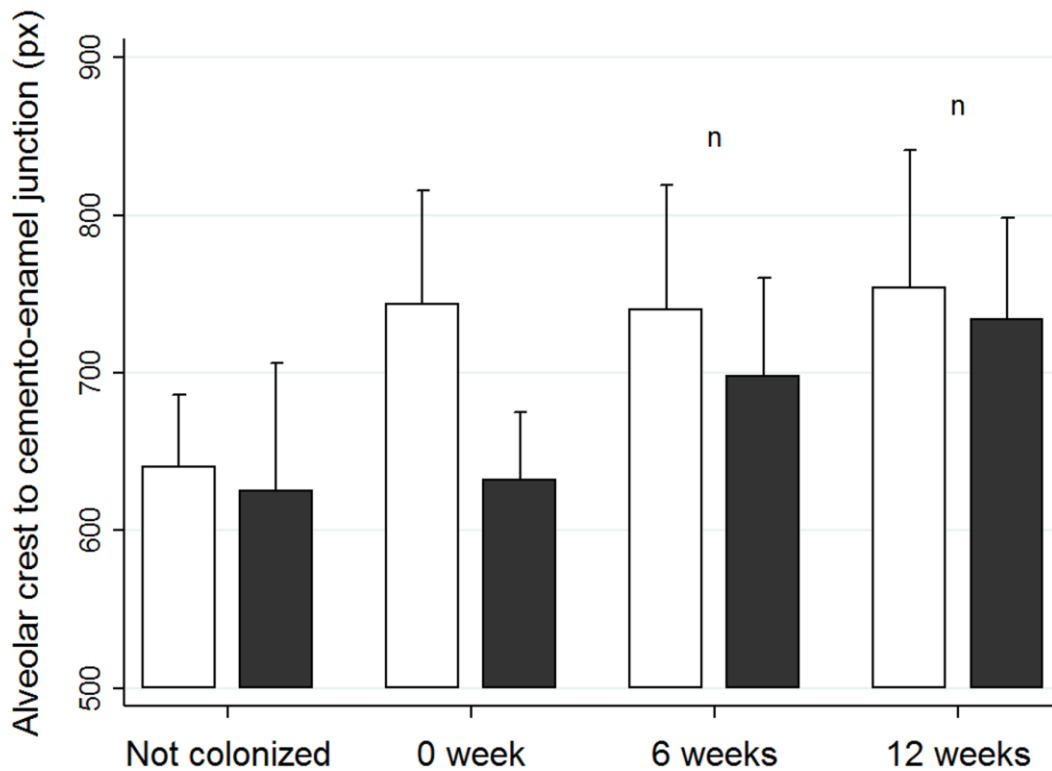

**Fig. S5: No effect of ASC for alveolar bone regeneration.** Results from histomorphometry analysis of alveolar bone. The distance between the alveolar crest and the cemento-enamel junction was measured in pixels in the control side (white bars) and the grafted side (gray bars). The “n” code indicated a significant difference of the treatment side between each time point and baseline and not colonized.

### Supplemental Table

| <b>Antibodies for immunofluorescence</b>      |           | <b>Supplier</b>         | <b>Dosage (v:v)</b> |
|-----------------------------------------------|-----------|-------------------------|---------------------|
| Bone Morphoprotein (BMP-2)<br>Goat anti-mouse | Primary   | Santa Cruz technologies | 1:50                |
| Osteopontin (OPN)<br>Rabbit anti-mouse        | Primary   | LF -175<br>Larry Fisher | 1:400               |
| SCA-1<br>Rat anti-mouse                       | Primary   | BD Pharmingen           | 1:100               |
| Rabbit anti-GFP Alexa 488                     | Primary   | Invitrogen              | 1:75                |
| CD146<br>Sheep anti-mouse                     | Primary   | R&D systems             | 1:75                |
| CD31 (PECAM-1)<br>Goat polyclonal M-20        | Primary   | Santa Cruz technologies | 1:100               |
| Swine anti-goat Alexa 488                     | Secondary | Invitrogen              | 1:200               |
| Donkey anti-rabbit Alexa 594                  | Secondary | Invitrogen              | 1:150               |
| Donkey anti-rat Alexa 594                     | Secondary | Invitrogen              | 1:200               |
| Donkey anti-sheep Alexa 647                   | Secondary | Invitrogen              | 1:150               |
| Goat anti-rat Alexa 488                       | Secondary | Invitrogen              | 1:200               |

| <b>Target for qPCR</b>                        | <b>Reverse</b>         | <b>Forward</b>               |
|-----------------------------------------------|------------------------|------------------------------|
| Osterix                                       | GATCAGATCCCCATTGGACTTC | CCAGAGTTAAGGAGATTGGTGTAGTAA  |
| AKP2 - Alkaline<br>phosphatase 2              | GATTCGGGCAGCGGTTACT    | CACCAATGTAGCCAAGAATGTCAT     |
| Runx                                          | TGGGTCCACACACCAACGCT   | TCAAAATCACAGTCACCGC          |
| AP2 - Adipocyte fatty<br>acid-binding protein | GCCATGCCTGCCACTTTG     | GATGCCTTGTGGGAACCTG          |
| LPL<br>Lipoprotein lipase                     | CTCTTGGTTTGTCCAGTGT    | ATCTGCAGAAGGGAAAGGACTC       |
| Adiponectin                                   | CCCTTCAGCTCCTGTCATTCC  | TCCTGGAGAGGGAGAGAAAAG        |
| PPAR $\gamma$                                 | GCACCATGCTCTGGGTCAA    | AGTGTGAATTACAGCAAATCTCTGTTTT |
| 36B4 - Gene taken as<br>reference             | GGCTGACTTGGTTGCTTTGG   | AGTCGGAGGAATCAGATGAGGAT      |

| <b>Flow cytometry antibodies</b> | <b>Supplier</b> | <b>Clone</b> | <b>Conjugates</b> |
|----------------------------------|-----------------|--------------|-------------------|
| CD31                             | BD Biosciences  | MEC 13.3     | PE                |
| CD45                             | BD Biosciences  | 30-F11       | APC               |
| SCA-1                            | BD Biosciences  | D7           | V500              |

**Table S1.**

List of used primary or secondary antibodies, with supplier and dosage

List of forward and reverse primers

List of used antibodies for FACS analysis
